# Supplementary material for: Monitoring beam charge during FLASH irradiations
Source: Frontiers journal article supplement (doi:10.3389/fphy.2023.1185237), 2023-09-11
Supplement: Data_Sheet_1.docx [file Data_Sheet_1.docx]

**Supplementary information:**

**S1 Toroid inductance formulae**

The inductance of toroidal core is approximately given by [[[1]](#endnote-1)]:

(Eq. S1)

Where = number of turns wound on core; = cross-sectional area of core; = radius of toroid to centreline; = relative permeability of the core.

The inductance is somewhat overestimated when using this formula with cores with rectangular cross-section. An alternative formula provides rather more accurate predictions [[[2]](#endnote-2), [[3]](#endnote-3)] for rectangular cross-section cores:

(Eq. S2)

Where the = core thickness, = core outer diameter, = core inner diameter.

**S2 Summary of alternative cores**

**A variety of alternative cores available from** Ferroxcube (Roermond, The Netherlands or Skierniewice, Poland), Magnetics Inc. **(Magnetics Inc,** Pittsburgh, PA, USA) and, in particular from Vacuumschmelze (Hanau, Germany) are presented below in Table S1. Other manufacturers include Epcos AG/TDK Electronics AG (Munich, Germany) and Cosmo Ferrites Ltd (Himachal Pradesh, India) amongst many others.

This list is not intended to be exhaustive and manufacturer material and part details should be always be checked. In general, more optimal resonant beam current monitors can be developed with many of the higher permeability, lower loss cores, allowing a smaller tuning capacitor to be used for a given maximum pulse width, or allowing the turn number to be reduced while still achieving a given inductance.

Use of cores made from nanocrystalline materials (Vitroperm and similar) and from amorphous materials (Vitrovac and similar) are particularly advantageous, resulting in a 3-5 fold increase in inductance for a given number of turns. These materials are particularly ‘soft’ magnetically, because both the values of magneto-crystalline anisotropy and magnetostriction coefficient for them can be tuned to near zero simultaneously.

It is somewhat unfortunate that may similar materials are classified under a range of different trade names. Iron-Silicon Alloys should be avoided as their losses increase rapidly above a few tens of hertz. Similarly, nickel-iron alloys are best avoided, unless used in very thin laminations, while soft ferrites are acceptable and amorphous nano-crystalline alloys are always preferred, despite their increased cost and density.

**Table S1. List of cores appropriate for BCITs**

| **Material** | ***μr*@25 oC** | ***μr*@100 oC** | **1 turn inductance (AL, nH/turn2)** | **For core size** | **Notes** |
| --- | --- | --- | --- | --- | --- |
| ***Ferroxcube*** | | | | | |
| 3C11 | 4300 | 6300 | 10800±25% | T107/65/25 | Acceptable for good sensitivity monitor |
| 3E6 | 10000 | 13000 | 20200±30% | T80/40/15 | Acceptable for small high sensitivity monitor |
| 3E10 | 7000 | 12500 | 20200±20% | T80/40/15 | Best material for high sensitivity monitor |
| 3E26 | 6000 | 7500 | 17900±25% | T63/38/25-3E26 | Good material for high *μr* toroid |
| 3E27 | 5200 | 7500 | 13800±25% | T140/106/25 | Acceptable material for large high *μr* toroid |
| 3E65 | 2000 | 5000 | Only small cores | -- | Excellent material for small high *μr* toroid |
| 3F3 | 2000 | 4000 | 5184±25% | T107/65/25 | Not optimal, but easy to obtain |
| ***Magnetics Inc*** | | | | | |
| R | 2500 | 4300 | 3025 | 9715 (102 x 65.8 x 15) | Comparable to material used here |
| P | 5000 | 3750 | 3464 | 9715 (102 x 65.8 x 15) | Acceptable material - comparable sensitivity |
| J | 10000 | 7200 | 6575 | 9715 (102 x 65.8 x 15) | Acceptable material – improved sensitivity |
| W | 2300 | 12000 | 11178 | 9715 (102 x 65.8 x 15) | Excellent, generally hard to obtain core |
| R | 2500 | 4300 | 4127 | 9718 (107 x 65 x 18) | Comparable to material used here. Larger core |
| P | 5000 | 3750 | 4486 | 9718 (107 x 65 x 18) | Acceptable material - comparable sensitivity |
| J | 10000 | 7200 | 8972 | 9718 (107 x 65 x 18) | Acceptable material – improved sensitivity |
| R | 2500 | 4300 | 5732 | 9725 (107 x 65 x 25) | Comparable to material used here |
| J | 10000 | 7200 | 9346 | 9725 (107 x 65 x 25) | Acceptable material – improved sensitivity |
| W | 2300 | 12000 | 21184 | 9725 (107 x 65 x 25) | Excellent, generally hard to obtain core |
| R | 2500 | 4300 | 3200 | 9740 (140 x 106 x 25) | Comparable to material used here, very large core |
| P | 5000 | 3750 | 3477 | 9740 (140 x 106 x 25) | Acceptable material - comparable sensitivity |
| J | 10000 | 7200 | 6955 | 9740 (140 x 106 x 25) | Acceptable material – improved sensitivity |
| W | 10000 | 12000 | 11823 | 9740 (140 x 106 x 25) | Excellent material for very large cores |
| **Vacuumschmelze** | | | | | |
| L2102-V347 | | | 11800 | 108.1x70x30.3 | Vitroperm 712 excellent material |
| L2160-V350 | | | 8300 | 160x130x25 | Vitroperm 712, excellent, for very large beam |
| L2160-W631 | | | 13100 | 165x125x8.5 | Vitroperm 500, excellent, for very large beam |
| L2100-W723 | | | 10000 | 104x75x23 | Vitroperm 500, excellent, hard to find |
| L2102-V080 | | | 17000 | 108.1x70x30.3 | Vitroperm 500, excellent, hard to find, core of choice |

**S3 BCIT resonance and tuning**

Prior to final installation the quality factor of the toroid was determined, using a set-up shown in Figure S1. The bandwidth was determined to be 143 Hz at half-power points on the resonance curve (0.707 of peak amplitude response) centred on 10.76 kHz, indicating a quality factor *QF* =138. In this experiment, the circuit was loaded with a parallel combination of 100 MΩ injection and 10 MΩ provided by the oscilloscope probe, i.e. by 9.09 MΩ.

*Figure S1: Top: Set-up used for determining resonance characteristic using sine wave excitation. Left: Resonance plot from wound toroid.*

The wound core’s self-resonant frequency was found to be 61.56 kHz. The stray capacitance of the coil was found by plotting (= resonant frequency) for various tuning capacitor values and examining the intercept, as shown in Figure S2 left. The thus-derived stray capacitance includes he capacitance of the probe (8.5 pF). The effective inductance can thus be derived and was found to be just under 100 mH.

However, these values will be modified slightly when the coil is varnished and the toroid is placed in it its final housing and indeed connected to its associated preamplifier. Electrostatic screens must change the inductor properties [[[4]](#endnote-4)] and an inevitable capacitance increase must occur. The total extrapolated toroid stray capacitance was found to be somewhat higher, as shown in Figure S2 right.

Since there are a total of 140 turns, the correct sensitivity will be obtained with a total tuning capacitance of 714 pF. The required physical tuning capacitance is thus ~620 pF, which can be made up with a parallel combination of 470 pF + 150 pF capacitors in parallel. Capacitors with tolerances <±1% are hard to find. This combination was found acceptable any charge errors can be readily calibrated out. The resonant frequency of the completed, installed toroid was ~19.5 kHz.

*Figure S2. Determination of inductor self-capacitance on the bench (left) and of the inductor installed in it is electrostatically shielded housing (right).*

The inter-turn capacitance topic is an interesting one. Interesting literature from the radio amateur world suggests that inter-turn capacitance does not play a role in determining the stray capacitance of single layers wound on ferrite toroidal ring core [[[5]](#endnote-5)], while capacitance to the core, and end-end capacitance does. Multilayer windings are to be avoided in this application [[[6]](#endnote-6), [[7]](#endnote-7), [[8]](#endnote-8)].

Measuring the self-capacitance of windings on highly dispersive, high permeability MnZn ferrite materials has been investigated [[[9]](#endnote-9)]. Permeability dispersion is one of the reasons for the difficulty in obtaining reliable data. Permeability variation does not account for all deviations from predicted performance, particularly at frequencies higher than a few tens of kilohertz.

**S4 Data acquisition system**

A bespoke data acquisition system has been developed for use with the charge monitor. Details of this have been published [[[10]](#endnote-10)] and will not be repeated here. Briefly, this is based around 250 kS/s, 16-bit resolution analogue to digital converters (ADS8339, Texas Instruments Inc, Dallas, Texas, USA) and a RISC architecture PIC microcontroller (Microchip 18F46K22, Chandler, Arizona, USA) feeding processed information through an I2C bus [[[11]](#endnote-11)]. Once all charge data in a pulse sequence have been acquired, the standard deviations are computed by the PIC. The PIC also drives a 100 kS/s digital to analogue converters (AD5061 Analog Devices Wilmington, MA, USA) to provide analogue signals that can be displayed in near‐real time during the irradiation.

**S5 Effects of temperature on performance**

Furthermore, there is limited collated information available on the consequences of inductance variation with temperature [[[12]](#endnote-12), [[13]](#endnote-13)], although relevant predictive models of the behaviour of ferrites are available [[[14]](#endnote-14)] . The 3F3 material data sheet indicates that the inductance would be expected to rise with temperature, as shown in Figure S3. Such inductance changes will only affect the resonant frequency and will only slightly impact the integration performance of the monitor. Since our device is operated in a laboratory environment, performance was assessed at 23 oC and 37 oC.

More stable materials are available, but in general are difficult to source in small quantities. Other, more temperature stable cores are presented in Table S1.

We found that the inductance at 37 oC increased by 14% from 92 mH at 23 oC to 105 mH. Over this limited range the temperature coefficient was found to be +1%/oC, in line with ferrite material data. Rather of greater concern, we also find the that the temperature coefficient of the total capacitance was of the order of +0.2%/oC. This is likely to be due to effects associated with varnish used to stabilise the windings or effects associated with the electrostatic screens. The resulting changes in frequency will have little effect on the calibrated sensitivity but the calibration will be affected by the change in capacitance. This demonstrates that a low turn number (low inductance) and hence a high tuning capacitance are always desirable, but will result in loss of sensitivity unless higher permeability cores are used.

*Figure S3. Variation of 3F3 core permeability with temperature.*

This indicates that an absolute accuracy of better than ±1% cannot be readily obtained with this type of monitor unless more stable, or higher permeability cores are employed. It is thus desirable to perform regular calibrations with a step voltage source, unless the ambient temperature can be controlled. In our installation, temperature variations did not exceed ±0.75 oC.

**S6 Use of charge monitor to optimise accelerator tuning**

The linac used in this work is of a travelling wave design and for a given gun heater setting, the optimal stable output can be easily found by tuning the radiofrequency matching to the accelerating waveguide. For high output charges/pulses during FLASH irradiations, the tuning is relatively sharp and the optimal tuning can be readily found by examining the charge monitor output from the peak detector; exemplar outputs are shown in Figure S4 on the right: it is straightforward to examine the ‘flatness’ of the peak detector output to ensure acceptable reproducibility from pulse to pulse. During CONV irradiations, this tuning is rather less critical and, since such irradiations are usually performed over a long time period, the accelerators automatic frequency control system is adequate. For short lasting FLASH irradiations, use of manual tuning is generally preferred.

*Figure S4. Pulse by pulse monitoring of the linac output. The resonant output from the BCIT pre-amplifier is shown the lighter trace, with the linac operating at a 300 Hz pulse repetition rate. The simultaneous output from the monitor’s peak detector is shown by the darker trace.*

**S7 Irradiation geometry**

The irradiation geometry is shown in Figure S5. Both the film samples and the AMC were positioned in the centre of the horizontal beam, at 10 mm depth within the solid water, and at a source-to-surface distance (SSD) of 50.0 cm. The irradiation ‘phantom’ was constructed from several solid water slabs to allowing the AMD to be fully enclosed while allowing straightforward interchange of film samples. This phantom was positioned behind a dual-plate energy monitor and collimator on a sliding mechanical arrangement to permit variation of source-sample distance. The beam diameter passing through the collimator was significantly larger than the active regions of film samples.

*Figure S5. Two views of the irradiation geometry used to obtain dose relationship between radiochromic film, BCIT charge and AMC charge. The BCIT is placed on the accelerator beam line, ~2 m ‘upstream’ of the output window.*

**S8 Charge monitor response with different pulse widths**

Although pulse width of 3.8 μs nominal are generally used with our charge monitor, its response to different pulse widths has been examined through simulation. Pulse widths in the range of 10 ns to 5 μs were investigated. The errors for a constant charge input of 200 nC are plotted in Figure S6. All errors were normalised to 3.8 μs pulse width. The error bars represent errors resulting from simulation resolution and convergence.

*Figure S6. Sensitivity to pulse width*

The response to shorter pulses was increased by ~0.03%, indicating that the toroid resonant frequency could be reduced somewhat. Furthermore, the resonant frequency is not adequate for pulse widths of >5 μs and such pulses are to be avoided. Such long pulses have never been observed in our linac. The resonant circuit inductance should be increased if pulses longer than 4 μs are to be monitored: this is best achieved through a change in the core material if sensitivities comparable to that achieved here are required.

**Supplementary references**

1. Terman, F.E. Radio Engineer’s Handbook, p. 57-58 1st edition, 1943, McGraw-Hill Book Company Inc. New York and London. [↑](#endnote-ref-1)
2. <http://www.nessengr.com/technical-data/toroid-inductor-formulas-and-calculator/>. [↑](#endnote-ref-2)
3. Dolbilkin, B.S., Kondratev, R.L., Lisin, V.P. and Polonsky, A.L. (1984) The choice of optimum parameters of a toroidal charge monitor for precision measurements *Nucl. Instrum. Meth.Physics Research,* **226**, 271-280. <https://doi.org/10.1016/0168-9002(84)90041-X>. [↑](#endnote-ref-3)
4. Simpson, T.D. (1999) Effect of a Conducting Shield on the Inductance of an Air-Core Solenoid *IEEE Transactions on Magnetics* **35**, 508-515. <https://doi.org/10.1109/20.737474>. [↑](#endnote-ref-4)
5. [www.g3ynh.info/zdocs/magnetics/appendix/Toroid_selfC.html](http://www.g3ynh.info/zdocs/magnetics/appendix/Toroid_selfC.html). [↑](#endnote-ref-5)
6. Kanzi, K., Nafissi, H.R. and Kanzi, M. (2014) A straightforward estimation approach for determining parasitic capacitance of inductors during high frequency operation. *Journal of International Conference on Electrical Machines and Systems*, **3**, 339-352. <https://doi.org/10.11142/jicems.2014.3.3.339>. [↑](#endnote-ref-6)
7. Massarini, A. and Kazimierczuk, M.K. (1997) Self-Capacitance of Inductors. *IEEE Transactions on Power Electronics*, **12**, 671-676. <https://doi.org/10.1109/63.602562>. [↑](#endnote-ref-7)
8. # Shishan, W., Zeyuan, L., and Xing, Y. (2010) Extraction of parasitic capacitance for toroidal ferrite core inductor *Industrial Electronics and Applications* (ICIEA), 2010 the 5th IEEE Conference on 15-17 June 2010 Pages 451 - 456 E-ISBN: 978-1-4244-5046-6 Print ISBN: 978-1-4244-5045-9 INSPEC Accession Number: 11433954 Location: Taichung; <https://doi.org/10.1109/ICIEA.2010.5517152>.

   [↑](#endnote-ref-8)
9. Yurshevich, V., Lomov, S. and Jankovskis, J. (2001) Measurement of Self-Capacitance for Windings on High-Permeability Ferrite Cores. *J. Meas. Sci. Review*, **1**, 219. <https://www.measurement.sk/>. [↑](#endnote-ref-9)
10. *Supplementary information section S5 in* Berne, A., Petersson, K., Tullis, I.D.C., Newman, R.G., and Vojnovic, B. Monitoring electron energies during FLASH irradiations. *Phys Med Biol*., **66**, 045015. <https://doi.org/10.1088/1361-6560/abd672>. [↑](#endnote-ref-10)
11. I2C Bus specification https://www.i2c-bus.org. [↑](#endnote-ref-11)
12. Ott, G., Wrba, J., and Lucke, R. (2003) Recent developments of Mn–Zn ferrites for high permeability applications *Journal of Magnetism and Magnetic Materials* **254–255**, 535-537. <https://doi.org/10.1016/S0304-8853(02)00961-7>. [↑](#endnote-ref-12)
13. Pannaparayil, T., Marande, R., and Komarneni, S. (1991) Magnetic properties of high‐density Mn‐Zn ferrites *Journal of Applied Physics* **69**, 5349. <https://doi.org/10.1063/1.348025>. [↑](#endnote-ref-13)
14. Zegadi, L., Rousseau, J.J., Allard, B., Tenant, P. and Renault, D. (2000) Model of power soft MnZn ferrites, including temperature effects *IEEE Transactions on Magnetics* **36**, 2022 – 2032. <https://doi.org/10.1109/20.875308>. [↑](#endnote-ref-14)
